# Supplementary material for: DCUN1D1 Is an Essential Regulator of Prostate Cancer Proliferation and Tumour Growth That Acts through Neddylation of Cullin 1, 3, 4A and 5 and Deregulation of Wnt/Catenin Pathway
Source: MDPI journal article supplement (doi:10.3390/cells12151973), 2023-07-31
Supplement: s1 [file s1]

## Supplementary Figure 1

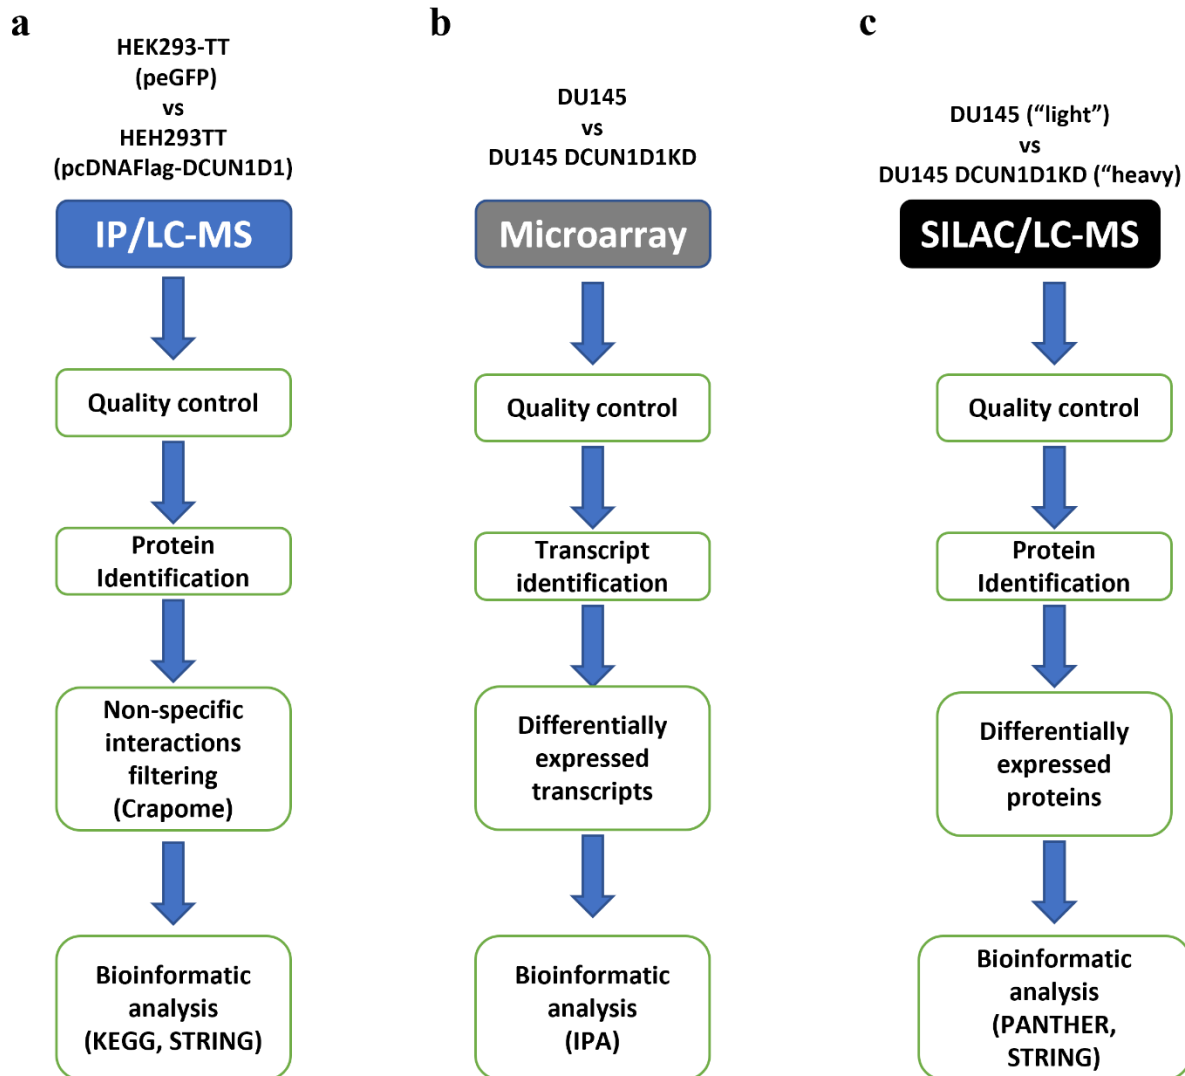

**Supplementary Figure 1. Schematic representation of the analysis performed.** Workflow representing the main analyses performed in: (a) IP/LC-MS, used for the identification of DCUN1D1 binding partners, (b) microarray and (c) SILAC/LC-MS, used for the identification of proteins and transcripts differentially expressed upon DCUN1D1 inhibition.

## Supplementary Figure 2

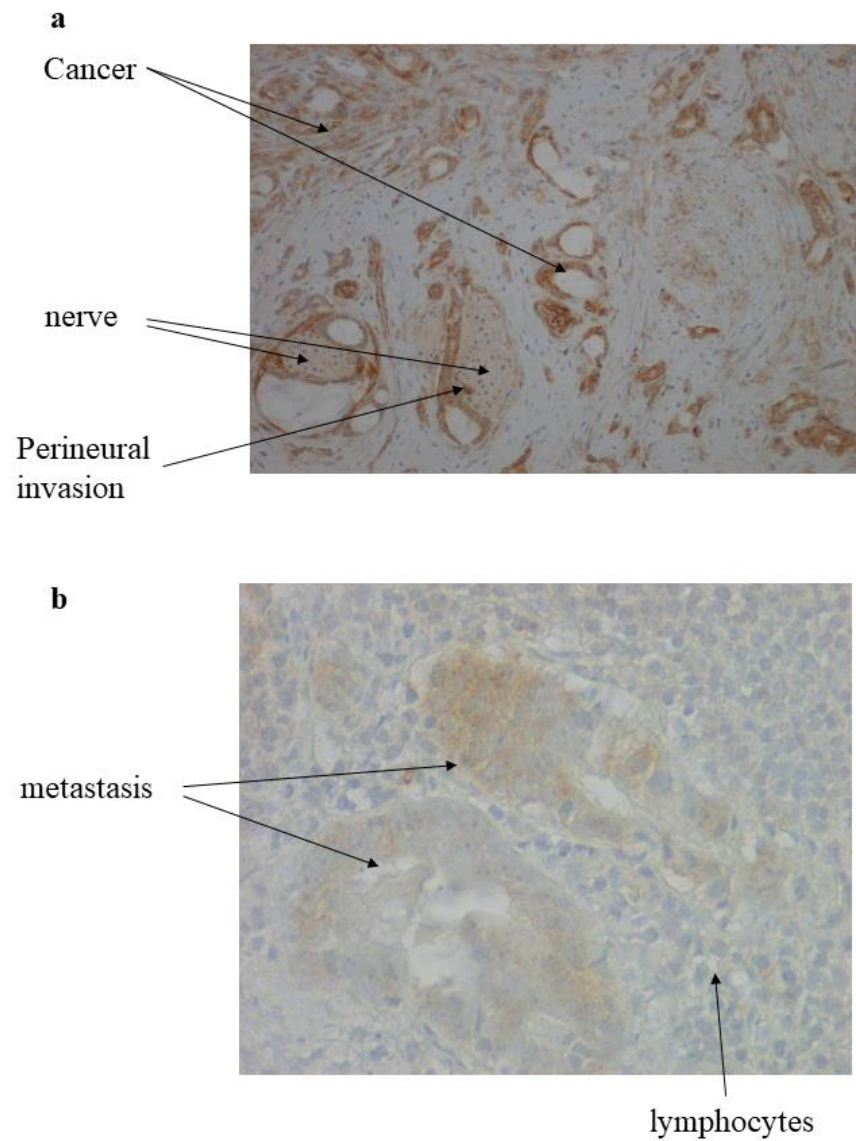

### **Supplementary Figure 2. DCUN1D1 is upregulated in metastatic prostate cancer tissue.**

Immunohistochemical staining of DCUN1D1 in representative prostate cancer biopsies. Staining of DCUN1D1 in perineural invaded (**a**) and (**b**) metastatic samples.

### Supplementary Figure 3

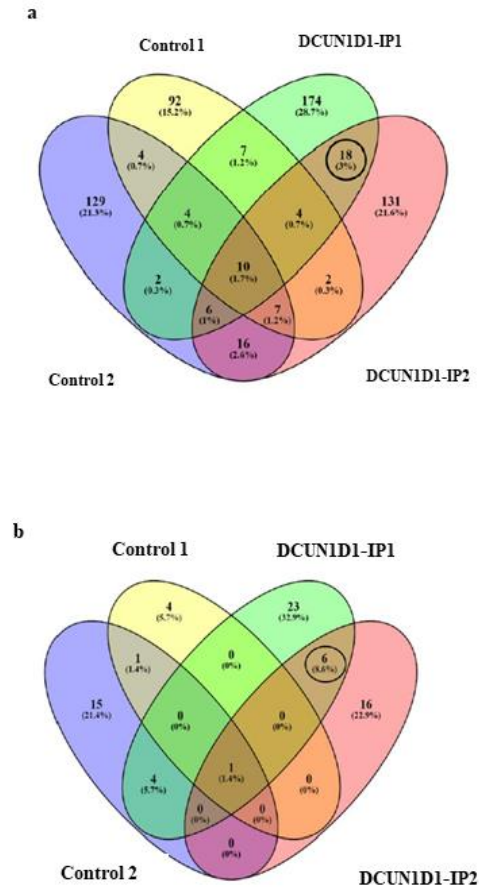

**Supplementary Figure 3. Analysis of the proteins identified for each sample to determine the relationships between the samples DCUN1D1-IP1 and IP2.** HEK293T cells were transfected in duplicates with either a negative control (peGFP-N3) or pcDNA-Flag-DCUN1D1 plasmid, submitted to co-immunoprecipitation for either the control (Control 1 and 2) or experimental (DCUN1D1-IP1 and 2), and analyzed by MS. Venn diagrams were generated using Venny 2.1.0 software. **(a)** Venn diagram distinguishing between proteins within a sample and those shared between a subset of the samples. **(b)** Venn diagram showing relationship between the samples

post-filtering. Data was filtered using the Crapome version 1.1, workflow 1, then we queried the data from each sample DCUN1D1-IP1 and 2 and searched against the H. sapiens database.

#### Supplementary Figure 4

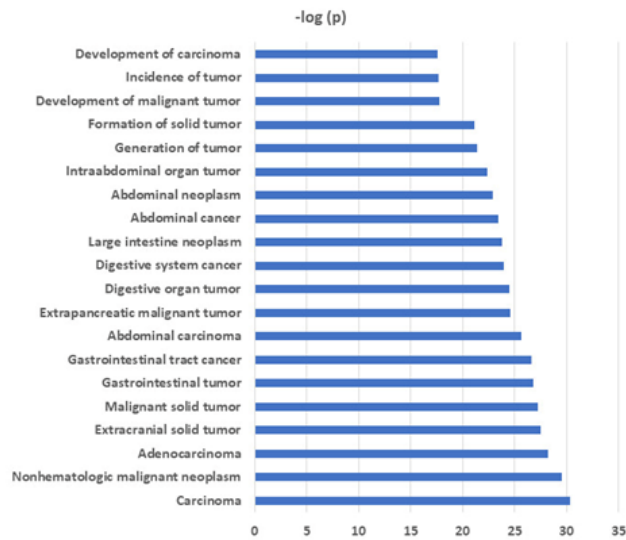

#### Supplementary Figure 4. Biological function analysis mediated by DCUN1D1 in PCa cells.

Dysregulated cancer functions in DU145 cells expressing the DCUN1D1 shRNA. Output is expressed as  $-\log(p\text{-value})$ .

## Supplementary Figure 5

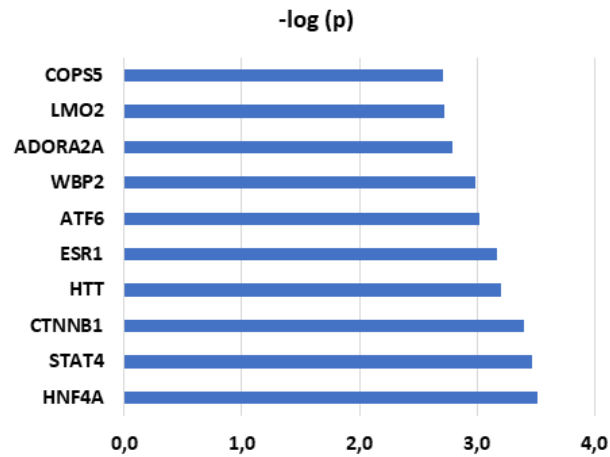

**Supplementary Figure 5. Ingenuity Upstream Regulator Analysis mediated by DCUN1D1 in PCa cells.** Regulators affected by expression of DCUN1D1 shRNA in DU145 cells. Output is expressed as  $-\log(p\text{-value})$ .

## Supplementary Figure 6

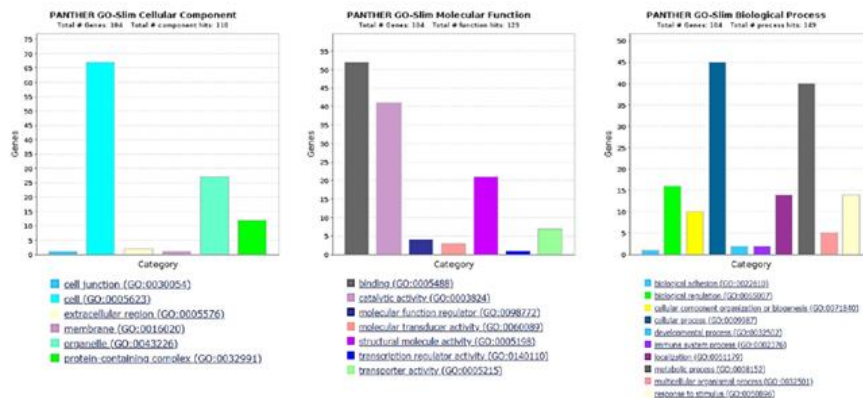

**Supplementary Figure 6.** Bioinformatics analysis of proteins dysregulated following DCUN1D1 knockdown PCa cells. Functional classification of cellular components, molecular functions, biological processes and pathways in DU145 cells expressing the DCUN1D1 shRNA. Bar charts

of Panther GO-Slim outputs. (Left) Experimental data classified according to cellular components, (centre) experimental data classified according to molecular functions and (right) experimental data classified according to biological processes.

### Supplementary Figure 7

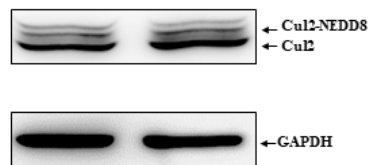

**Supplementary Figure 7.** Blockage of DCUN1D1 does not affect neddylation of Cul2. Immunoblot analysis of DU145 and DU145 DCUN1D1 knockdown cell protein extracts using The GAPDH loading control was probed using the anti-GAPDH antibody. All experiments were independently repeated three times and the blots correspond to a representative image of an independent experiment.

**Supplementary table 1: Details on the 18 proteins found to overlap between samples  
DCUN1D1 IP1 and DCUN1D1 IP2**

| <b>Protein Name</b> | <b>DCUN1D1<br/>IP1<br/>Accession<br/>number</b> | <b>DCUN1D1<br/>IP1<br/>Unique<br/>Peptides</b> | <b>DCUN1D1<br/>IP2<br/>Accession<br/>number</b> | <b>DCUN1D1<br/>IP2<br/>Unique<br/>Peptides</b> |
|---------------------|-------------------------------------------------|------------------------------------------------|-------------------------------------------------|------------------------------------------------|
| <b>DCUN1D1</b>      | ENSP0000029<br>2782                             | 14                                             | ENSP0000029<br>2782                             | 11                                             |
| <b>CAND1</b>        | ENSP0000044<br>2318                             | 13                                             | ENSP0000044<br>2318                             | 25                                             |
| <b>CUL3</b>         | ENSP0000026<br>4414                             | 10                                             | ENSP0000026<br>4414                             | 9                                              |
| <b>RPS19</b>        | ENSP0000022<br>1975                             | 5                                              | ENSP0000022<br>1975                             | 2                                              |
| <b>CUL4B</b>        | ENSP0000036<br>0373                             | 4                                              | ENSP0000036<br>0373                             | 3                                              |
| <b>RBX1</b>         | ENSP0000021<br>6225                             | 2                                              | ENSP0000021<br>6225                             | 2                                              |
| <b>BAT2L1</b>       | ENSP0000038<br>4606                             | 2                                              | ENSP0000038<br>4606                             | 1                                              |
| <b>C1orf77</b>      | ENSP0000035<br>7683                             | 1                                              | ENSP0000035<br>7683                             | 2                                              |
| <b>MCAT</b>         | ENSP0000029<br>0429                             | 1                                              | ENSP0000029<br>0429                             | 1                                              |
| <b>C10orf103</b>    | ENSP0000039<br>4678                             | 1                                              | ENSP0000039<br>4678                             | 1                                              |
| <b>COL19A1</b>      | ENSP0000031<br>6030                             | 1                                              | ENSP0000031<br>6030                             | 1                                              |
| <b>TMEM14A</b>      | ENSP0000021<br>1314                             | 1                                              | ENSP0000021<br>1314                             | 1                                              |
| <b>COL1A2</b>       | ENSP0000029<br>7268                             | 1                                              | ENSP0000029<br>7268                             | 2                                              |
| <b>COL15A1</b>      | ENSP0000036<br>4140                             | 1                                              | ENSP0000036<br>4140                             | 1                                              |
| <b>G6PD</b>         | ENSP0000037<br>7192                             | 1                                              | ENSP0000037<br>7192                             | 1                                              |
| <b>ACE2</b>         | ENSP0000025<br>2519                             | 1                                              | ENSP0000025<br>2519                             | 1                                              |
| <b>COL13A1</b>      | ENSP0000038<br>1949                             | 1                                              | ENSP0000038<br>1949                             | 1                                              |
| <b>PITRM1</b>       | ENSP0000037<br>0367                             | 1                                              | ENSP0000022<br>4949                             | 1                                              |

**Supplementary table 2: List of top 10 upregulated genes after inhibition of DCUN1D1**

| <b>Gene</b>      | <b>Description</b>                                        | <b>Fold change</b> |
|------------------|-----------------------------------------------------------|--------------------|
| <b>1</b> ATP6AP2 | ATPase, H+<br>transporting, lysosomal accessory protein 2 | 19.97              |
| <b>2</b> EEF2    | Eukaryotic translationelongation factor 2                 | 6.3                |
| <b>3</b> UBE2C   | Ubiquitin-conjugatingenzyme 2C                            | 5.9                |
| <b>4</b> SPTBN1  | Spectrin, beta, nonerythrocytic1                          | 4.4                |
| <b>5</b> BAT2D1  | BAT2 domaincontaining 1                                   | 4.04               |
| <b>6</b> TNPO1   | Transportin 1                                             | 3.85               |
| <b>7</b> SF3B1   | Splicing factor 3b,subunit 1, 155kDa                      | 3.68               |
| <b>8</b> CADM1   | Cell adhesion molecule 1                                  | 3.59               |
| <b>9</b> SH3GLB1 | SH3-domain GRB2-like endophilin B1                        | 3.48               |
| <b>10</b> HAX1   | HCLS1 associatedprotein X-1                               | 3.24               |



**Supplementary table 3: List of top 10 downregulated genes after inhibition of DCUN1D1**

| <b>Gene</b>       | <b>Description</b>                              | <b>Fold change</b> |
|-------------------|-------------------------------------------------|--------------------|
| <b>1</b> UBE2J2   | Ubiquitin-conjugating enzyme E2, J2             | -9.5               |
| <b>2</b> BAT2     | HLA-B associated transcript 2                   | -8.46              |
| <b>3</b> ZFPM1    | Zinc finger protein, multitype 1                | -6.97              |
| <b>4</b> CLDN6    | Claudin 6                                       | -6.73              |
| <b>5</b> TNPO2    | Transportin 2                                   | -6.4               |
| <b>6</b> NMNAT3   | Nicotinamide nucleotide adenylyltransferase 3   | -5.93              |
| <b>7</b> EPHB4    | EPH receptor B4                                 | -5.38              |
| <b>8</b> ACAA2    | Acetyl-Coenzyme A acyltransferase 2             | -5.36              |
| <b>9</b> ACAD10   | Acyl-Coenzyme A dehydrogenase family, member 10 | -5.04              |
| <b>10</b> FAM109A | Family with sequence similarity 109, member A   | -5.01              |

**Supplementary table 4: List of 100 proteins found across the replicate samples**

| Protein name |         |       |         |
|--------------|---------|-------|---------|
| EIF3C        | HSP7C   | GRP75 | 1433E   |
| PHGDH        | PABPC1  | RS19  | RPS14   |
| ACTN4        | EF2     | RPS9  | RS13    |
| HNRPQ        | KPYM    | RS10  | RL7A    |
| LDHA         | ENPL    | IDHP  | RS6     |
| DHE3         | DDX5    | TCPG  | E5RI99  |
| ALDOA        | TCPA    | EFTU  | PPIA    |
| ANXA1        | PGAM1   | SYAC  | RACK1   |
| G3P          | FLNA    | GDIB  | EF1A3   |
| AT1A1        | UBA1    | TCPQ  | TBB4B   |
| ALDH2        | ROA2    | HNRPF | SLC25A3 |
| ADT2         | RS3     | SYYC  | HNRNPU  |
| EIF2S1       | SAHH    | XPO2  | SRSF2   |
| CDK1         | ATPA    | TERA  | EIF4G1  |
| ATPB         | MOES    | EIF3B | PRDX1   |
| ENO1         | RPL13   | MYL6  | TIF1B   |
| NPM          | VAR5    | ACTB  | IMB1    |
| P4HB         | CAD     | IF4A1 | PLEC    |
| ANXA2        | TKT     | RS20  | PCBP2   |
| TUBB         | PDIA3   | RS3A  | TBA1C   |
| HS90A        | PPP2R1A | RPL15 | PDC6I   |
| HS90B        | GLYM    | RL27  | NAA15   |
| ODPA         | HSPA4   | HNRPK | NSF1C   |
| RPSA         | MYH9    | RS8   | RUVBL2  |
| BIP          | PRS7    | RS16  | TLN1    |
